# Supplementary material
Source: PubMed Central journal article supplement (PMC6750964)
Supplement: NIHMS1522534-supplement-1.pdf [file NIHMS1522534-supplement-1.pdf]

## SUPPLEMENTAL MATERIAL

**Supplemental Table 1. Food and beverage groups used for classification in analysis**

| Group                                       | Description                                                                                                                                                                                                                    |
|---------------------------------------------|--------------------------------------------------------------------------------------------------------------------------------------------------------------------------------------------------------------------------------|
| <b>Foods</b>                                |                                                                                                                                                                                                                                |
| 1. Cereal-based foods                       | Grains; flour, starches and similar; pasta; dough; bread, bulk; bread, packaged                                                                                                                                                |
| 2. Ready-to-eat breakfast cereals           | -                                                                                                                                                                                                                              |
| 3. Grain-based desserts                     | Sweet bakery products; cookies; cereal and protein bars                                                                                                                                                                        |
| 4. Other sweets and desserts                | Sugar, honey and syrups; jam and sweet spreads; gelatin; ice cream and frozen treats; chocolate and candies, with sugar; chocolate and candies, sugar-free; milk modifiers; non-caloric sweeteners; other dairy-based desserts |
| 5. Salty Snacks                             | Crackers; chips; nuts and seeds.                                                                                                                                                                                               |
| 6. Meats and meat substitutes               | Poultry; beef; pork; other meats; meat substitutes                                                                                                                                                                             |
| 7. Fish and others                          | Fresh or frozen fish and other seafood; canned and dried fish and other seafood; unprocessed seaweed; processed seaweed                                                                                                        |
| 8. Dairy foods                              | Milk cream, evaporated milk and condensed milk; cheese; yogurt                                                                                                                                                                 |
| 9. Eggs                                     | -                                                                                                                                                                                                                              |
| 10. Legumes                                 | Unprocessed legumes; processed legumes                                                                                                                                                                                         |
| 11. Fruits and vegetables                   | Unprocessed vegetables; processed vegetables; unprocessed fruits; processed fruits                                                                                                                                             |
| 12. Condiments and sauces                   | Condiments (vinegar, ketchup, mayonnaise, mustard); sauces (tomato, soy, teriyaki, unagi)                                                                                                                                      |
| 13. Salt and seasonings                     | Includes items such as salt, seasonings (natural and industrialized) and bouillon cubes.                                                                                                                                       |
| 14. Soups                                   | Dry soups; canned soups                                                                                                                                                                                                        |
| 15. Oils and fats                           | Vegetable oils; butter and lard; margarine and similar products                                                                                                                                                                |
| 16. <i>Empanadas</i> and <i>sopaipillas</i> | Mostly <i>empanadas</i> (fried filled dough, typically filled with meat and vegetables or cheese) and <i>sopaipillas</i> (fried dough)                                                                                         |
| 17. Fast food                               | Mostly <i>completos</i> (hot dog sandwich), hamburgers, pizza and potato fries.                                                                                                                                                |
| 18. Baby food                               | Mostly cereal-based (i.e. Nestum®)                                                                                                                                                                                             |
| <b>Beverages</b>                            |                                                                                                                                                                                                                                |
| 19. Water                                   | Plain water; low-calorie flavored water                                                                                                                                                                                        |
| 20. Sugar-sweetened water                   | Prepared from concentrate (i.e. Kapo®, Zuko®, Sprim®)                                                                                                                                                                          |
| 21. Energy and sport drinks                 | Regular sport drinks; regular energy drinks; diet sports drinks; diet energy drinks                                                                                                                                            |
| 22. Carbonated beverages                    | Regular sodas; diet sodas                                                                                                                                                                                                      |
| 23. Fruit-flavored drinks                   | Mostly fruit nectars with added sugar                                                                                                                                                                                          |
| 24. 100% fruit juice                        | 100% fruit juice without added sugar                                                                                                                                                                                           |
| 25. Coffee and tea                          | Coffee; tea; herbal tea. With and without added sugar                                                                                                                                                                          |
| 26. Dairy beverages                         | Milk; dairy drinks; drinkable yogurts; fermented milks; dairy based beverages; prepared milk modifiers. With and without added sugar                                                                                           |
| 27. Formula                                 | Includes baby, toddler and elderly formulas (i.e. Nido®, Pediasure®)                                                                                                                                                           |
| 28. Alcoholic beverages                     | Mostly small quantities of wine used as part of food preparations                                                                                                                                                              |

**Supplemental Table 2. Recipes that were not disaggregated into individual components**

| <b>Classified as</b>                | <b>Original recipe name</b>                                                                                                                                                                | <b>Classified as</b>                        | <b>Original recipe name</b>                                                                                                                    |
|-------------------------------------|--------------------------------------------------------------------------------------------------------------------------------------------------------------------------------------------|---------------------------------------------|------------------------------------------------------------------------------------------------------------------------------------------------|
| Cereal-based food (group 1)         | Pan amasado casero                                                                                                                                                                         | Fruits and vegetables (group 11)            | Compota de manzana<br>Macedonia                                                                                                                |
| Grain-based desserts (group 3)      | Calzón roto<br>Colegial<br>Galleta casera<br>Galleta de avena casera<br>Panqueque<br>Panqueque relleno con manjar<br>Pie de limón<br>Queque casero (varias recetas)<br>Tartaleta de frutas | Condiments and sauces (group 12)            | Mayonesa casera                                                                                                                                |
|                                     |                                                                                                                                                                                            | <i>Empanadas and sopaipillas</i> (group 16) | Arepa<br>Arrollado de jamón y queso<br>Arrollado primavera<br>Chaparrita frita<br>Empanada (varias recetas)<br>Sopaipilla<br>Sopaipilla pasada |
| Other sweets and desserts (group 4) | Arroz con leche<br>Flan (varias recetas)<br>Leche asada<br>Sémola con leche (varias recetas)<br>Merengue<br>Mermelada (varias recetas)<br>Mousse de frutilla                               | Fast food (group 17)                        | Completo italiano<br>Hamburguesa<br>Papas fritas<br>Pizza (todas las recetas)                                                                  |

**Supplemental Table 3.** Mean per capita intakes of energy and other nutrients in Chilean children and adolescents, by snacks and meals.

| Energy /<br>Nutrient assessed | Snacks |     |         |     | Meals |     |         |     |   |
|-------------------------------|--------|-----|---------|-----|-------|-----|---------|-----|---|
|                               | Males  |     | Females |     | Males |     | Females |     |   |
|                               | Mean   | SE  | Mean    | SE  | Mean  | SE  | Mean    | SE  |   |
| <b>Children (n=958)</b>       |        |     |         |     |       |     |         |     |   |
| Energy, kcal/day              | 368    | 12  | 352     | 11  | 880   | 15  | 827     | 14  | * |
| Intakes, macronutrients       |        |     |         |     |       |     |         |     |   |
| Total protein, g/d            | 8.7    | 0.3 | 8.7     | 0.5 | 35.9  | 0.7 | 33.5    | 0.6 | * |
| Total carbohydrates, g/d      | 61.0   | 2.0 | 56.5    | 1.7 | 120.0 | 2.2 | 112.8   | 2.1 | * |
| Total sugars, g/d             | 39.3   | 1.3 | 35.5    | 1.2 | 49.2  | 1.2 | 47.6    | 1.1 | * |
| Total fat, g/d                | 10.9   | 0.5 | 11.0    | 0.5 | 28.9  | 0.6 | 27.3    | 0.6 |   |
| Saturated fat, g/d            | 4.0    | 0.2 | 4.2     | 0.2 | 9.4   | 0.2 | 9.0     | 0.2 |   |
| Intakes, micronutrients       |        |     |         |     |       |     |         |     |   |
| Sodium, mg/d                  | 288    | 14  | 274     | 13  | 935   | 29  | 884     | 25  |   |
| <b>Adolescents (n=752)</b>    |        |     |         |     |       |     |         |     |   |
| Energy, kcal/day              | 538    | 25  | 521     | 25  | 1454  | 30  | 1179    | 25  | * |
| Intakes, macronutrients       |        |     |         |     |       |     |         |     |   |
| Total protein, g/d            | 10.4   | 0.6 | 10.8    | 0.7 | 57.0  | 1.4 | 46.9    | 1.1 | * |
| Total carbohydrates, g/d      | 80.3   | 3.6 | 77.7    | 3.5 | 195.5 | 4.1 | 158.1   | 3.4 | * |
| Total sugars, g/d             | 41.7   | 2.1 | 41.1    | 2.0 | 65.7  | 2.2 | 50.7    | 1.6 | * |
| Total fat, g/d                | 20.5   | 1.1 | 19.7    | 1.1 | 49.8  | 1.4 | 40.3    | 1.2 | * |
| Saturated fat, g/d            | 6.6    | 0.4 | 6.7     | 0.4 | 15.1  | 0.5 | 11.9    | 0.4 | * |
| Intakes, micronutrients       |        |     |         |     |       |     |         |     |   |
| Sodium, mg/d                  | 507    | 31  | 483     | 34  | 1887  | 55  | 1467    | 44  | * |

\* p<0.05. Independent sample t-test comparing males vs. females, within each age group.
